# Supplementary material
Source: Research Square preprint supplement (doi:10.21203/rs.3.rs-9234165/v1)
Supplement: Supplementary file 1 [file 703c8e06db6d222a588b3546.docx]

**Assessment of the impact of cellulose, adhesive labels and metals on the chemical recyclability of high-impact polystyrene from yogurt cups**

Saddys Rodríguez Llamazares a*, Mario I. Sanhueza a, Constanza Sabando a, Diego Ricciardi a,b, Serguei Alejandro-Martín b,c*, Rebeca Bouza d, Sonia Dopico d, Natalia Pettinelli a, Edgar Pastene e, Eliezer Velásquez f,g

a Centro de Investigación de Polímeros Avanzados, Edificio Laboratorio CIPA, Av. Collao 1202, Concepción, Chile.

b Department of Process Engineering and Bioproducts, Fac. of Engineering, Universidad del Bío-Bío, Concepción, Chile.

c Laboratory of Gas Chromatography and Analytical Pyrolysis, Fac. of Engineering, Universidad del Bío-Bío (UBB), Concepción, Chile.

d Universidade da Coruña, Grupo de Polímeros, Departamento de Física y Ciencias de la Tierra, Escuela Universitaria Politécnica, Serantes, Avda. 19 de Febrero s/n, 15471 Ferrol, Spain.

e Department of Basic Sciences, Faculty of Sciences, Universidad del Bío-Bío, Avenida Andrés Bello 720, Chillan 3800708, Chile.

f Technology Center for Packaging Innovation (LABEN-Chile), University of Santiago of Chile (USACH), Santiago 9170201, Chile.

g Center of Nanoscience and Nanotechnology (CEDENNA), University of Santiago of Chile (USACH), Santiago 9170124, Chile.

Corresponding authors: Saddys Rodríguez Llamazares, [s.rodriguez@cipachile.cl](mailto:s.rodriguez@cipachile.cl),
https://orcid.org/0000-0002-3892-9398
Serguei Alejandro-Martín, [salejandro@ubiobio.cl](mailto:salejandro@ubiobio.cl)


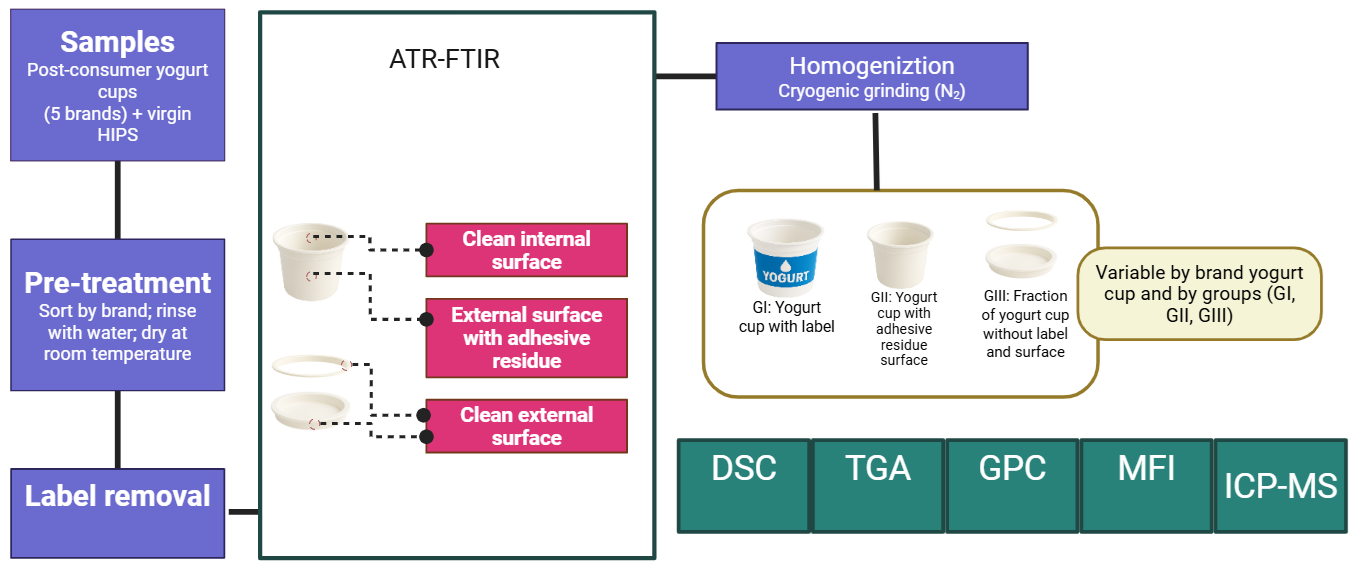


Online Resource 1: Overview of the sample pre-treatment and analytical workflow applied to post-consumer HIPS yogurt cups and virgin reference material, including FT-IR (ATR) screening coupled to Principal Component Analysis (PCA), followed by cryogenic grinding and bulk characterization by TGA, DSC, GPC, MFI, ICP-MS, and Py-GC-MS.


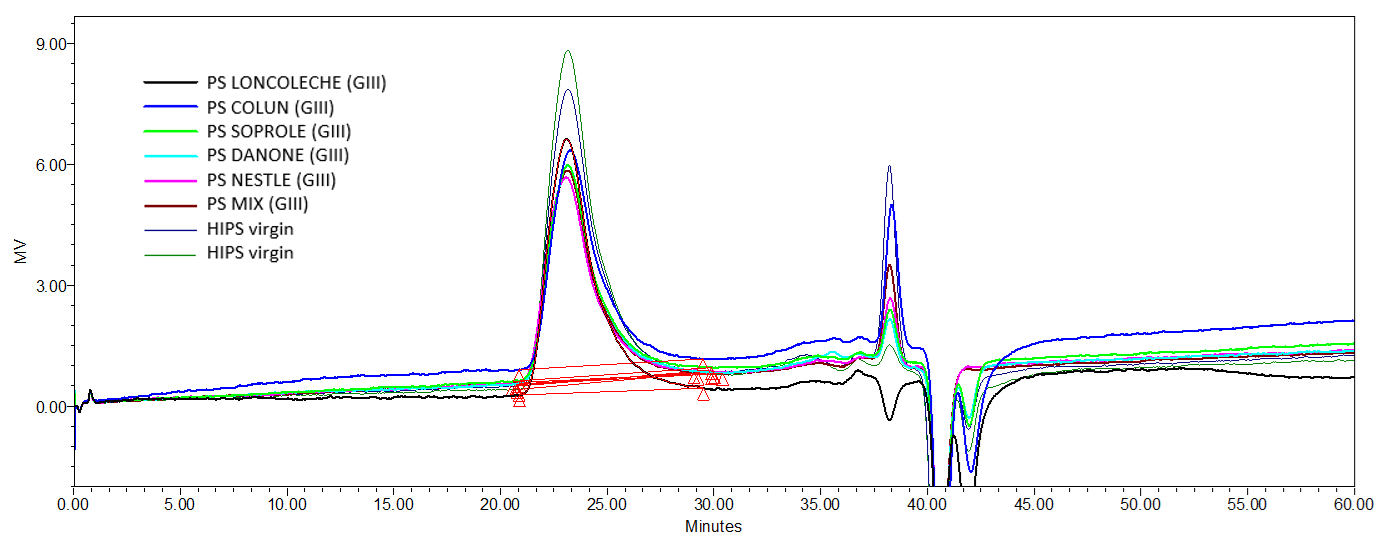


Online Resource 2. Chromatograms of post-consumer polystyrene (PS) packaging samples (Group III), including a PS mix, compared with virgin HIPS reference(s).

Online Resource 3: Pyrolysis products from post-consumer high-impact polystyrene (HIPS) yogurt containers.

| **Sample code** | **Replicate** | **Compound** | **Family** | **Peak Area** |
| --- | --- | --- | --- | --- |
| D-GI | 1 | Glycidol | Alcohols | 0.35 |
| Acetic acid, anhydride with formic acid | Acids | 0.28 |
| 2-Propanone, 1-hydroxy- | Ketones | 0.78 |
| Toluene | Aromatic hydrocarbons | 3.10 |
| Cyclohexene, 4-ethenyl- | Aliphatic hydrocarbons | 0.39 |
| Benzene, 1,3-dimethyl- | Aromatic hydrocarbons | 1.53 |
| Styrene | Aromatic hydrocarbons | 89.64 |
| α-Methylstyrene | Aromatic hydrocarbons | 1.46 |
| Unknown | Unknown | 2.46 |
| 2 | Toluene | Aromatic hydrocarbons | 3.81 |
| Cyclohexene, 4-ethenyl- | Aliphatic hydrocarbons | 0.28 |
| Benzene, 1,3-dimethyl- | Aromatic hydrocarbons | 1.09 |
| Styrene | Aromatic hydrocarbons | 88.28 |
| Benzene, cyclopropyl- | Aromatic hydrocarbons | 0.50 |
| α-Methylstyrene | Aromatic hydrocarbons | 3.64 |
| Benzene, 2-propenyl- | Aromatic hydrocarbons | 0.44 |
| Unknown | Unknown | 1.97 |
| D-GII | 1 | Toluene | Aromatic hydrocarbons | 3.37 |
| Cyclohexene, 4-ethenyl- | Aliphatic hydrocarbons | 0.48 |
| Ethylbenzene | Aromatic hydrocarbons | 0.40 |
| Styrene | Aromatic hydrocarbons | 93.92 |
| α-Methylstyrene | Aromatic hydrocarbons | 0.99 |
| Unknown | Unknown | 0.85 |
| 2 | Toluene | Aromatic hydrocarbons | 1.84 |
| Cyclohexene, 4-ethenyl- | Aliphatic hydrocarbons | 0.25 |
| Styrene | Aromatic hydrocarbons | 95.94 |
| α-Methylstyrene | Aromatic hydrocarbons | 1.36 |
| Unknown | Unknown | 0.62 |
| D-GIII | 1 | Toluene | Aromatic hydrocarbons | 3.75 |
| Cyclohexene, 4-ethenyl- | Aliphatic hydrocarbons | 0.45 |
| Benzene, 1,3-dimethyl- | Aromatic hydrocarbons | 0.44 |
| Styrene | Aromatic hydrocarbons | 92.49 |
| α-Methylstyrene | Aromatic hydrocarbons | 1.52 |
| Unknown | Unknown | 1.35 |
| 2 | Toluene | Aromatic hydrocarbons | 1.89 |
| Styrene | Aromatic hydrocarbons | 96.52 |
| α-Methylstyrene | Aromatic hydrocarbons | 0.77 |
| Unknown | Unknown | 0.82 |
| C-GI | 1 | Methyl glyoxal | Aldehydes | 3.98 |
| 2,3-Butanedione | Ketones | 0.67 |
| Acetaldehyde, hydroxy- | Aldehydes | 1.33 |
| (Z)-1,3-Butadien-1-ol | Alcohols | 0.24 |
| Acetic acid, anhydride with formic acid | Acids | 2.63 |
| 2-Propanone, 1-hydroxy- | Ketones | 5.90 |
| Toluene | Aromatic hydrocarbons | 1.77 |
| Cyclohexene, 4-ethenyl- | Aliphatic hydrocarbons | 1.98 |
| 3-Furaldehyde | Aldehydes | 0.21 |
| Styrene | Aromatic hydrocarbons | 57.04 |
| Furfural | Aldehydes | 2.54 |
| 3-Furanmethanol | Furans | 0.43 |
| Acetic acid ethenyl ester | Esters | 0.24 |
| α-Methylstyrene | Aromatic hydrocarbons | 0.35 |
| 2-Cyclopenten-1-one, 2-hydroxy- | Ketones | 0.36 |
| 2(5H)-Furanone | Furans | 1.36 |
| Levoglucosenone | Sugars | 0.35 |
| Cyclopropyl carbinol | Alcohols | 0.53 |
| Benzene, 1,1'-(1,3-propanediyl)bis- | Aromatic hydrocarbons | 0.27 |
| Naphthalene, 1,2,3,4-tetrahydro-2-phenyl- | Aromatic hydrocarbons | 11.03 |
| Unknown | Unknown | 6.79 |
| 2 | Methyl glyoxal | Aldehydes | 0.26 |
| Acetic acid, anhydride with formic acid | Acids | 0.73 |
| 2-Propanone, 1-hydroxy- | Ketones | 2.02 |
| Toluene | Aromatic hydrocarbons | 8.17 |
| Cyclohexene, 4-ethenyl- | Aliphatic hydrocarbons | 0.51 |
| Ethylbenzene | Aromatic hydrocarbons | 3.34 |
| Styrene | Aromatic hydrocarbons | 66.22 |
| Benzene, (1-methylethyl)- | Aromatic hydrocarbons | 0.56 |
| Benzene, cyclopropyl- | Aromatic hydrocarbons | 0.83 |
| α-Methylstyrene | Aromatic hydrocarbons | 5.21 |
| Benzene, 2-propenyl- | Aromatic hydrocarbons | 0.62 |
| Benzene, 3-butenyl- | Aromatic hydrocarbons | 0.41 |
| Benzene, (1-methylenepropyl)- | Aromatic hydrocarbons | 0.67 |
| Indene | Aromatic hydrocarbons | 0.84 |
| 2(5H)-Furanone | Furans | 0.33 |
| Benzene, (1-methylenebutyl)- | Aromatic hydrocarbons | 0.24 |
| 1-Phenylbicyclo[2.1.1]hexane | Aromatic hydrocarbons | 0.25 |
| Cyclopropyl carbinol | Alcohols | 0.24 |
| Bibenzyl | Aromatic hydrocarbons | 0.31 |
| Cyclopropylphenylmethane | Aromatic hydrocarbons | 1.03 |
| Unknown | Unknown | 7.24 |
| 3 | 3-Pentyn-1-ol | Alcohols | 2.82 |
| Benzene | Aromatic hydrocarbons | 1.36 |
| Acetic acid, anhydride with formic acid | Acids | 0.26 |
| 2-Propanone, 1-hydroxy- | Ketones | 0.79 |
| Toluene | Aromatic hydrocarbons | 4.89 |
| Ethylbenzene | Aromatic hydrocarbons | 4.70 |
| Styrene | Aromatic hydrocarbons | 51.09 |
| Benzene, (1-methylethyl)- | Aromatic hydrocarbons | 1.09 |
| Benzene, cyclopropyl- | Aromatic hydrocarbons | 1.28 |
| 2-Furanmethanol | Furans | 0.22 |
| α-Methylstyrene | Aromatic hydrocarbons | 9.13 |
| Benzene, 2-propenyl- | Aromatic hydrocarbons | 1.47 |
| Benzene, 3-butenyl- | Aromatic hydrocarbons | 0.63 |
| Benzene, (1-methylenepropyl)- | Aromatic hydrocarbons | 2.14 |
| Indene | Aromatic hydrocarbons | 4.04 |
| 2(5H)-Furanone | Furans | 0.28 |
| Benzene, 1-propynyl- | Aromatic hydrocarbons | 0.22 |
| Benzene, 1,3-diethenyl- | Aromatic hydrocarbons | 0.23 |
| Benzene, (1-methylenebutyl)- | Aromatic hydrocarbons | 0.38 |
| Cycloprop[a]indene, 1,1a,6,6a-tetrahydro- | Aliphatic hydrocarbons | 0.77 |
| Naphthalene, 1,2-dihydro- | Aromatic hydrocarbons | 1.12 |
| Naphthalene | Aromatic hydrocarbons | 2.24 |
| 1-Phenylbicyclo[2.1.1]hexane | Aromatic hydrocarbons | 0.23 |
| 7-Tetradecene | Aliphatic hydrocarbons | 0.28 |
| Cyclopropyl carbinol | Alcohols | 0.28 |
| Benzocycloheptatriene | Aromatic hydrocarbons | 0.25 |
| 1H-Indene, 1-ethylidene- | Aromatic hydrocarbons | 0.24 |
| Naphthalene, 1-methyl- | Aromatic hydrocarbons | 0.42 |
| Biphenyl | Aromatic hydrocarbons | 0.64 |
| Diphenylmethane | Aromatic hydrocarbons | 0.34 |
| Bibenzyl | Aromatic hydrocarbons | 0.37 |
| Unknown | Unknown | 5.82 |
| C-GII | 1 | Toluene | Aromatic hydrocarbons | 4.76 |
| Cyclohexene, 4-ethenyl- | Aliphatic hydrocarbons | 0.32 |
| Ethylbenzene | Aromatic hydrocarbons | 0.57 |
| Styrene | Aromatic hydrocarbons | 86.17 |
| Benzene, cyclopropyl- | Aromatic hydrocarbons | 0.70 |
| α-Methylstyrene | Aromatic hydrocarbons | 3.72 |
| Benzene, 2-propenyl- | Aromatic hydrocarbons | 0.43 |
| Benzene, (1-methylenepropyl)- | Aromatic hydrocarbons | 0.22 |
| Indene | Aromatic hydrocarbons | 0.37 |
| Bibenzyl | Aromatic hydrocarbons | 0.89 |
| Benzene, 1,1'-(1-methyl-1,2-ethanediyl)bis- | Aromatic hydrocarbons | 0.30 |
| Unknown | Unknown | 1.56 |
| 2 | Toluene | Aromatic hydrocarbons | 9.63 |
| Ethylbenzene | Aromatic hydrocarbons | 0.43 |
| Styrene | Aromatic hydrocarbons | 69.68 |
| Benzene, cyclopropyl- | Aromatic hydrocarbons | 1.09 |
| α-Methylstyrene | Aromatic hydrocarbons | 6.07 |
| Benzene, 2-propenyl- | Aromatic hydrocarbons | 0.74 |
| Benzene, 3-butenyl- | Aromatic hydrocarbons | 0.50 |
| Benzene, (1-methylenepropyl)- | Aromatic hydrocarbons | 0.54 |
| Indene | Aromatic hydrocarbons | 0.72 |
| Benzene, (1-methylenebutyl)- | Aromatic hydrocarbons | 0.35 |
| 1,9-Decadiyne | Aliphatic hydrocarbons | 0.23 |
| 1-Phenylbicyclo[2.1.1]hexane | Aromatic hydrocarbons | 0.35 |
| Bibenzyl | Aromatic hydrocarbons | 1.19 |
| Benzene, 1,1'-(1-methyl-1,2-ethanediyl)bis- | Aromatic hydrocarbons | 0.36 |
| Cyclopropylphenylmethane | Aromatic hydrocarbons | 0.61 |
| Unknown | Unknown | 7.52 |
| 3 | Methylenecyclopropane | Aliphatic hydrocarbons | 0.28 |
| 3-Penten-1-yne, (E)- | Aliphatic hydrocarbons | 0.58 |
| Benzene | Aromatic hydrocarbons | 8.24 |
| Toluene | Aromatic hydrocarbons | 5.04 |
| Cyclohexene, 4-ethenyl- | Aliphatic hydrocarbons | 0.20 |
| Ethylbenzene | Aromatic hydrocarbons | 1.66 |
| Styrene | Aromatic hydrocarbons | 42.14 |
| Benzene, (1-methylethyl)- | Aromatic hydrocarbons | 0.50 |
| Benzene, cyclopropyl- | Aromatic hydrocarbons | 0.96 |
| α-Methylstyrene | Aromatic hydrocarbons | 4.41 |
| Benzene, 2-propenyl- | Aromatic hydrocarbons | 1.27 |
| Benzene, 3-butenyl- | Aromatic hydrocarbons | 0.47 |
| Benzene, (1-methylenepropyl)- | Aromatic hydrocarbons | 0.60 |
| Indene | Aromatic hydrocarbons | 5.60 |
| Benzene, 1-propynyl- | Aromatic hydrocarbons | 0.31 |
| Benzene, 1,3-diethenyl- | Aromatic hydrocarbons | 0.35 |
| 3-Dodecene, (Z)- | Aliphatic hydrocarbons | 0.21 |
| Cycloprop[a]indene, 1,1a,6,6a-tetrahydro- | Aliphatic hydrocarbons | 0.81 |
| 1,4-Dihydronaphthalene | Aromatic hydrocarbons | 0.30 |
| Naphthalene, 1,2-dihydro- | Aromatic hydrocarbons | 1.19 |
| Naphthalene | Aromatic hydrocarbons | 9.81 |
| 1-Phenylbicyclo[2.1.1]hexane | Aromatic hydrocarbons | 0.22 |
| 7-Tetradecene | Aliphatic hydrocarbons | 0.24 |
| 1H-Indene, 1-ethylidene- | Aromatic hydrocarbons | 0.42 |
| Naphthalene, 1-methyl- | Aromatic hydrocarbons | 1.23 |
| 1-Tetradecene | Aliphatic hydrocarbons | 0.31 |
| Naphthalene, 2-methyl- | Aromatic hydrocarbons | 1.27 |
| Biphenyl | Aromatic hydrocarbons | 2.07 |
| Diphenylmethane | Aromatic hydrocarbons | 0.63 |
| Naphthalene, 2-ethenyl- | Aromatic hydrocarbons | 0.41 |
| Acenaphthylene | Aromatic hydrocarbons | 1.90 |
| Bibenzyl | Aromatic hydrocarbons | 0.68 |
| Unknown | Unknown | 5.68 |
| C-GIII | 1 | Benzene | Aromatic hydrocarbons | 4.24 |
| Toluene | Aromatic hydrocarbons | 1.42 |
| Ethylbenzene | Aromatic hydrocarbons | 2.04 |
| Styrene | Aromatic hydrocarbons | 80.99 |
| α-Methylstyrene | Aromatic hydrocarbons | 0.25 |
| Benzene, 1-propynyl- | Aromatic hydrocarbons | 2.20 |
| Naphthalene | Aromatic hydrocarbons | 0.92 |
| Unknown | Unknown | 7.93 |
| 2 | Toluene | Aromatic hydrocarbons | 4.81 |
| Cyclohexene, 4-ethenyl- | Aliphatic hydrocarbons | 0.56 |
| Ethylbenzene | Aromatic hydrocarbons | 1.03 |
| Styrene | Aromatic hydrocarbons | 81.80 |
| Benzene, cyclopropyl- | Aromatic hydrocarbons | 1.22 |
| α-Methylstyrene | Aromatic hydrocarbons | 5.28 |
| Benzene, 2-propenyl- | Aromatic hydrocarbons | 0.25 |
| Benzene, (1-methylene-2-propenyl)- | Aromatic hydrocarbons | 0.26 |
| Benzene, 1-propenyl- | Aromatic hydrocarbons | 0.86 |
| Benzene, 3-butenyl- | Aromatic hydrocarbons | 0.36 |
| Benzene, (1-methylenepropyl)- | Aromatic hydrocarbons | 0.34 |
| Indene | Aromatic hydrocarbons | 0.40 |
| Benzene, (1-methylenebutyl)- | Aromatic hydrocarbons | 0.26 |
| Unknown | Unknown | 2.58 |
| N-GI | 1 | Toluene | Aromatic hydrocarbons | 2.76 |
| Cyclohexene, 4-ethenyl- | Aliphatic hydrocarbons | 0.28 |
| Benzene, 1,3-dimethyl- | Aromatic hydrocarbons | 0.25 |
| Styrene | Aromatic hydrocarbons | 86.92 |
| Benzene, 2-propenyl- | Aromatic hydrocarbons | 0.66 |
| α-Methylstyrene | Aromatic hydrocarbons | 4.04 |
| Benzene, cyclopropyl- | Aromatic hydrocarbons | 0.41 |
| Benzene, (1-methylenepropyl)- | Aromatic hydrocarbons | 0.35 |
| Indene | Aromatic hydrocarbons | 0.45 |
| Bibenzyl | Aromatic hydrocarbons | 1.12 |
| Benzene, 1,1'-(1-methyl-1,2-ethanediyl)bis- | Aromatic hydrocarbons | 0.42 |
| Unknown | Unknown | 2.35 |
| 2 | Methylenecyclopropane | Aliphatic hydrocarbons | 0.93 |
| Benzene | Aromatic hydrocarbons | 0.99 |
| Toluene | Aromatic hydrocarbons | 4.90 |
| Ethylbenzene | Aromatic hydrocarbons | 3.99 |
| Styrene | Aromatic hydrocarbons | 58.82 |
| Benzene, (1-methylethyl)- | Aromatic hydrocarbons | 0.92 |
| Benzene, cyclopropyl- | Aromatic hydrocarbons | 1.34 |
| α-Methylstyrene | Aromatic hydrocarbons | 8.83 |
| Benzene, 2-propenyl- | Aromatic hydrocarbons | 1.73 |
| Benzene, 3-butenyl- | Aromatic hydrocarbons | 0.41 |
| Benzene, (1-methylenepropyl)- | Aromatic hydrocarbons | 1.47 |
| Indene | Aromatic hydrocarbons | 4.15 |
| Benzene, 1-propynyl- | Aromatic hydrocarbons | 0.25 |
| Benzene, 1,3-diethenyl- | Aromatic hydrocarbons | 0.30 |
| Benzene, (1-methylenebutyl)- | Aromatic hydrocarbons | 0.29 |
| Naphthalene, 1,2-dihydro- | Aromatic hydrocarbons | 0.69 |
| 1,4-Dihydronaphthalene | Aromatic hydrocarbons | 1.33 |
| Naphthalene | Aromatic hydrocarbons | 2.03 |
| Cyclopropyl carbinol | Alcohols | 0.24 |
| 1H-Indene, 1-ethylidene- | Aromatic hydrocarbons | 0.60 |
| Biphenyl | Aromatic hydrocarbons | 0.53 |
| Diphenylmethane | Aromatic hydrocarbons | 0.45 |
| Bibenzyl | Aromatic hydrocarbons | 0.33 |
| Unknown | Unknown | 4.48 |
| N-GII | 1 | Toluene | Aromatic hydrocarbons | 4.35 |
| Cyclohexene, 4-ethenyl- | Aliphatic hydrocarbons | 0.56 |
| Ethylbenzene | Aromatic hydrocarbons | 0.63 |
| Styrene | Aromatic hydrocarbons | 87.97 |
| Benzene, 2-propenyl- | Aromatic hydrocarbons | 0.51 |
| α-Methylstyrene | Aromatic hydrocarbons | 3.02 |
| Indane | Aromatic hydrocarbons | 0.28 |
| Bibenzyl | Aromatic hydrocarbons | 1.12 |
| Benzene, 1,1'-(1-methyl-1,2-ethanediyl)bis- | Aromatic hydrocarbons | 0.32 |
| Unknown | Unknown | 1.24 |
| 2 | Methylenecyclopropane | Aliphatic hydrocarbons | 0.35 |
| 1,3-Butadiyne | Aliphatic hydrocarbons | 0.22 |
| Benzene | Aromatic hydrocarbons | 6.03 |
| Toluene | Aromatic hydrocarbons | 1.36 |
| Ethylbenzene | Aromatic hydrocarbons | 0.37 |
| Styrene | Aromatic hydrocarbons | 80.10 |
| Benzene, 2-propenyl- | Aromatic hydrocarbons | 0.29 |
| α-Methylstyrene | Aromatic hydrocarbons | 1.42 |
| Benzene, 1-propynyl- | Aromatic hydrocarbons | 2.19 |
| Naphthalene | Aromatic hydrocarbons | 5.31 |
| Biphenyl | Aromatic hydrocarbons | 0.55 |
| Unknown | Unknown | 1.82 |
| N-GIII | 1 | Toluene | Aromatic hydrocarbons | 4.46 |
| Cyclohexene, 4-ethenyl- | Aliphatic hydrocarbons | 0.38 |
| Ethylbenzene | Aromatic hydrocarbons | 0.35 |
| Styrene | Aromatic hydrocarbons | 89.05 |
| Benzene, 2-propenyl- | Aromatic hydrocarbons | 0.48 |
| α-Methylstyrene | Aromatic hydrocarbons | 2.24 |
| Benzene, 1-propenyl- | Aromatic hydrocarbons | 0.33 |
| Bibenzyl | Aromatic hydrocarbons | 0.88 |
| Benzene, 1,1'-(1-methyl-1,2-ethanediyl)bis- | Aromatic hydrocarbons | 0.27 |
| Benzene, 1,1'-(2-butene-1,4-diyl)bis- | Aromatic hydrocarbons | 0.34 |
| Unknown | Unknown | 1.21 |
| S-GI | 1 | Methyl glyoxal | Aldehydes | 0.70 |
| Acetic acid, anhydride with formic acid | Acids | 0.56 |
| 2-Propanone, 1-hydroxy- | Ketones | 1.86 |
| Toluene | Aromatic hydrocarbons | 4.73 |
| Cyclohexene, 4-ethenyl- | Aliphatic hydrocarbons | 0.41 |
| Benzene, 1,3-dimethyl- | Aromatic hydrocarbons | 2.66 |
| Styrene | Aromatic hydrocarbons | 73.86 |
| Benzene, cyclopropyl- | Aromatic hydrocarbons | 0.74 |
| 2-Furanmethanol | Furans | 0.29 |
| α-Methylstyrene | Aromatic hydrocarbons | 4.88 |
| 2-Cyclopenten-1-one, 2-hydroxy- | Ketones | 0.23 |
| Deltacyclene | Aliphatic hydrocarbons | 0.55 |
| Benzene, 3-butenyl- | Aromatic hydrocarbons | 0.23 |
| Benzene, (1-methylenepropyl)- | Aromatic hydrocarbons | 0.33 |
| Benzene, 1-propynyl- | Aromatic hydrocarbons | 0.59 |
| 2(5H)-Furanone | Furans | 0.47 |
| Cyclopropyl carbinol | Alcohols | 0.36 |
| Bibenzyl | Aromatic hydrocarbons | 0.33 |
| Unknown | Unknown | 6.22 |
| S-GII | 1 | 1,4-Cyclohexadiene | Aliphatic hydrocarbons | 0.28 |
| Toluene | Aromatic hydrocarbons | 9.76 |
| Cyclohexene, 4-ethenyl- | Aliphatic hydrocarbons | 1.44 |
| Ethylbenzene | Aromatic hydrocarbons | 1.41 |
| Styrene | Aromatic hydrocarbons | 66.76 |
| Benzene, 2-propenyl- | Aromatic hydrocarbons | 1.23 |
| α-Methylstyrene | Aromatic hydrocarbons | 7.59 |
| Benzene, cyclopropyl- | Aromatic hydrocarbons | 0.26 |
| Benzene, (1-methylene-2-propenyl)- | Aromatic hydrocarbons | 0.22 |
| Deltacyclene | Aliphatic hydrocarbons | 0.92 |
| Benzene, 3-butenyl- | Aromatic hydrocarbons | 0.47 |
| Benzene, (1-methylenepropyl)- | Aromatic hydrocarbons | 0.65 |
| Indene | Aromatic hydrocarbons | 0.80 |
| Benzene, (1-methylenebutyl)- | Aromatic hydrocarbons | 0.46 |
| Benzene, 3-pentenyl-, (Z)- | Aromatic hydrocarbons | 0.34 |
| Naphthalene, 1,2-dihydro- | Aromatic hydrocarbons | 0.27 |
| 1-Phenylbicyclo[2.1.1]hexane | Aromatic hydrocarbons | 0.45 |
| Diphenylmethane | Aromatic hydrocarbons | 0.20 |
| Bibenzyl | Aromatic hydrocarbons | 2.18 |
| Benzene, 1,1'-(1-methyl-1,2-ethanediyl)bis- | Aromatic hydrocarbons | 1.18 |
| Unknown | Unknown | 3.12 |
| 2 | Benzene | Aromatic hydrocarbons | 0.62 |
| Toluene | Aromatic hydrocarbons | 6.81 |
| Cyclohexene, 4-ethenyl- | Aliphatic hydrocarbons | 0.66 |
| Ethylbenzene | Aromatic hydrocarbons | 2.23 |
| Styrene | Aromatic hydrocarbons | 62.44 |
| Benzene, (1-methylethyl)- | Aromatic hydrocarbons | 1.14 |
| Benzene, 2-propenyl- | Aromatic hydrocarbons | 1.49 |
| α-Methylstyrene | Aromatic hydrocarbons | 9.18 |
| Benzene, cyclopropyl- | Aromatic hydrocarbons | 0.39 |
| Benzene, (1-methylene-2-propenyl)- | Aromatic hydrocarbons | 0.35 |
| Deltacyclene | Aliphatic hydrocarbons | 1.08 |
| Benzene, 3-butenyl- | Aromatic hydrocarbons | 0.64 |
| Benzene, (1-methylenepropyl)- | Aromatic hydrocarbons | 1.20 |
| Indene | Aromatic hydrocarbons | 1.83 |
| Benzene, (1-methylenebutyl)- | Aromatic hydrocarbons | 0.57 |
| Benzene, 3-pentenyl-, (Z)- | Aromatic hydrocarbons | 0.34 |
| 2-Methylindene | Aromatic hydrocarbons | 0.24 |
| Naphthalene, 1,2-dihydro- | Aromatic hydrocarbons | 0.40 |
| Naphthalene | Aromatic hydrocarbons | 0.27 |
| 1-Phenylbicyclo[2.1.1]hexane | Aromatic hydrocarbons | 0.44 |
| Diphenylmethane | Aromatic hydrocarbons | 0.26 |
| Bibenzyl | Aromatic hydrocarbons | 2.56 |
| Benzene, 1,1'-(1-methyl-1,2-ethanediyl)bis- | Aromatic hydrocarbons | 1.18 |
| Unknown | Unknown | 3.68 |
| S-GIII | 1 | 1,3,5-Hexatriene | Aliphatic hydrocarbons | 0.28 |
| Benzene | Aromatic hydrocarbons | 1.37 |
| Toluene | Aromatic hydrocarbons | 9.86 |
| Cyclohexene, 4-ethenyl- | Aliphatic hydrocarbons | 0.46 |
| Ethylbenzene | Aromatic hydrocarbons | 4.51 |
| Styrene | Aromatic hydrocarbons | 53.95 |
| Benzene, (1-methylethyl)- | Aromatic hydrocarbons | 0.23 |
| Benzene, cyclopropyl- | Aromatic hydrocarbons | 1.52 |
| α-Methylstyrene | Aromatic hydrocarbons | 10.94 |
| Benzene, 2-propenyl- | Aromatic hydrocarbons | 0.47 |
| Benzene, (1-methylpropyl)- | Aromatic hydrocarbons | 0.21 |
| Benzene, (1-methylene-2-propenyl)- | Aromatic hydrocarbons | 0.42 |
| (Z)-1-Phenylpropene | Aliphatic hydrocarbons | 1.14 |
| Benzene, 3-butenyl- | Aromatic hydrocarbons | 0.64 |
| (E)-1-Phenyl-1-butene | Aliphatic hydrocarbons | 1.54 |
| Indene | Aromatic hydrocarbons | 2.40 |
| Benzene, (1-methylenebutyl)- | Aromatic hydrocarbons | 0.52 |
| Benzene, 3-pentenyl-, (E)- | Aromatic hydrocarbons | 0.35 |
| 1H-Indene, 3-methyl- | Aromatic hydrocarbons | 0.59 |
| Naphthalene, 1,2-dihydro- | Aromatic hydrocarbons | 0.56 |
| Naphthalene | Aromatic hydrocarbons | 0.62 |
| 1-Phenylbicyclo[2.1.1]hexane | Aromatic hydrocarbons | 0.39 |
| Biphenyl | Aromatic hydrocarbons | 0.26 |
| Diphenylmethane | Aromatic hydrocarbons | 0.24 |
| Bibenzyl | Aromatic hydrocarbons | 2.12 |
| Benzene, 1,1'-(1-methyl-1,2-ethanediyl)bis- | Aromatic hydrocarbons | 0.83 |
| Benzene, 1,1'-(2-butene-1,4-diyl)bis- | Aromatic hydrocarbons | 0.27 |
| Unkown | Unknown | 3.35 |
| 2 | Toluene | Aromatic hydrocarbons | 2.46 |
| Cyclohexene, 4-ethenyl- | Aliphatic hydrocarbons | 4.82 |
| Ethylbenzene | Aromatic hydrocarbons | 0.46 |
| Styrene | Aromatic hydrocarbons | 86.39 |
| Benzene, (1-methylethyl)- | Aromatic hydrocarbons | 0.20 |
| α-Methylstyrene | Aromatic hydrocarbons | 0.23 |
| Benzene, 1,1'-(2-butene-1,4-diyl)bis- | Aromatic hydrocarbons | 2.90 |
| Unknown | Unknown | 2.53 |
| 3 | Methylenecyclopropane | Aliphatic hydrocarbons | 0.49 |
| Toluene | Aromatic hydrocarbons | 3.29 |
| Cyclohexene, 4-ethenyl- | Aliphatic hydrocarbons | 0.49 |
| Ethylbenzene | Aromatic hydrocarbons | 0.66 |
| Styrene | Aromatic hydrocarbons | 83.99 |
| Benzene, (1-methylethyl)- | Aromatic hydrocarbons | 0.57 |
| Benzene, cyclopropyl- | Aromatic hydrocarbons | 0.43 |
| α-Methylstyrene | Aromatic hydrocarbons | 3.38 |
| Benzene, 2-propenyl- | Aromatic hydrocarbons | 0.24 |
| Benzene, 3-butenyl- | Aromatic hydrocarbons | 0.22 |
| Benzene, (1-methylenepropyl)- | Aromatic hydrocarbons | 0.60 |
| 3-Methylphenylacetylene | Aromatic hydrocarbons | 0.85 |
| Bibenzyl | Aromatic hydrocarbons | 0.34 |
| Benzene, 1,1'-(2-butene-1,4-diyl)bis- | Aromatic hydrocarbons | 2.19 |
| Unknown |  | 2.26 |
| L-GI | 1 | Methyl glyoxal | Aldehydes | 0.53 |
| Acetic acid ethenyl ester | Esters | 0.33 |
| Acetic acid, anhydride with formic acid | Acids | 0.64 |
| 2-Propanone, 1-hydroxy- | Ketones | 2.40 |
| Toluene | Aromatic hydrocarbons | 4.74 |
| Cyclohexene, 4-ethenyl- | Aliphatic hydrocarbons | 0.98 |
| Ethylbenzene | Aromatic hydrocarbons | 1.74 |
| Styrene | Aromatic hydrocarbons | 76.53 |
| Benzene, 2-propenyl- | Aromatic hydrocarbons | 0.52 |
| 2-Furanmethanol | Furans | 0.29 |
| α-Methylstyrene | Aromatic hydrocarbons | 2.56 |
| 2-Cyclopenten-1-one, 2-hydroxy- | Ketones | 0.25 |
| Benzene, cyclopropyl- | Aromatic hydrocarbons | 0.48 |
| Benzene, (1-methylenepropyl)- | Aromatic hydrocarbons | 0.24 |
| Benzene, 1-ethynyl-4-methyl- | Aromatic hydrocarbons | 0.42 |
| 2(5H)-Furanone | Furans | 0.59 |
| Cyclopropyl carbinol | Alcohols | 0.47 |
| Unknown | Unknown | 6.28 |
| 2 | Methyl glyoxal | Aldehydes | 1.34 |
| Acetic acid ethenyl ester | Esters | 0.65 |
| Acetic acid, anhydride with formic acid | Acids | 0.87 |
| 2-Propanone, 1-hydroxy- | Ketones | 5.17 |
| Toluene | Aromatic hydrocarbons | 1.29 |
| Cyclohexene, 4-ethenyl- | Aliphatic hydrocarbons | 0.45 |
| Ethylbenzene | Aromatic hydrocarbons | 0.95 |
| Styrene | Aromatic hydrocarbons | 81.74 |
| Furfural | Aldehydes | 1.50 |
| 2-Furanmethanol | Furans | 0.38 |
| 2-Cyclopenten-1-one, 2-hydroxy- | Ketones | 0.23 |
| Butyrolactone | Esters | 0.21 |
| 2(5H)-Furanone | Furans | 0.69 |
| Cyclopropyl carbinol | Alcohols | 0.58 |
| Unknown | Unknown | 3.96 |
| L-GII | 1 | Benzene | Aromatic hydrocarbons | 0.54 |
| 1 | Toluene | Aromatic hydrocarbons | 7.56 |
| Cyclohexene, 4-ethenyl- | Aliphatic hydrocarbons | 0.63 |
| Benzene, 1,3-dimethyl- | Aromatic hydrocarbons | 1.85 |
| Styrene | Aromatic hydrocarbons | 65.99 |
| Benzene, (1-methylethyl)- | Aromatic hydrocarbons | 0.77 |
| Benzene, 2-propenyl- | Aromatic hydrocarbons | 1.15 |
| α-Methylstyrene | Aromatic hydrocarbons | 8.21 |
| 1,3-Methanopentalene, 1,2,3,5-tetrahydro- | Aliphatic hydrocarbons | 0.28 |
| Benzene, (1-methylene-2-propenyl)- | Aromatic hydrocarbons | 0.29 |
| Benzene, 1-propenyl- | Aromatic hydrocarbons | 0.85 |
| Benzene, 3-butenyl- | Aromatic hydrocarbons | 0.48 |
| Benzene, (1-methylenepropyl)- | Aromatic hydrocarbons | 0.93 |
| Indene | Aromatic hydrocarbons | 1.63 |
| Benzene, (1-methylenebutyl)- | Aromatic hydrocarbons | 0.38 |
| Benzene, 3-pentenyl-, (E)- | Aromatic hydrocarbons | 0.23 |
| Naphthalene, 1,2-dihydro- | Aromatic hydrocarbons | 0.29 |
| 1-Phenylbicyclo[2.1.1]hexane | Aromatic hydrocarbons | 0.33 |
| Bibenzyl | Aromatic hydrocarbons | 2.96 |
| Benzene, 1,1'-(1-methyl-1,2-ethanediyl)bis- | Aromatic hydrocarbons | 1.50 |
| Unknown | Unknown | 3.16 |
| 2 | Propane | Aliphatic hydrocarbons | 0.38 |
| Toluene | Aromatic hydrocarbons | 1.02 |
| Cyclohexene, 4-ethenyl- | Aliphatic hydrocarbons | 1.16 |
| Ethylbenzene | Aromatic hydrocarbons | 0.85 |
| Styrene | Aromatic hydrocarbons | 95.28 |
| Unknown | Unknown | 1.31 |
| 3 | Methylenecyclopropane | Aliphatic hydrocarbons | 0.22 |
| Toluene | Aromatic hydrocarbons | 4.62 |
| Cyclohexene, 4-ethenyl- | Aliphatic hydrocarbons | 0.40 |
| Benzene, 1,3-dimethyl- | Aromatic hydrocarbons | 0.77 |
| Styrene | Aromatic hydrocarbons | 84.59 |
| Benzene, 2-propenyl- | Aromatic hydrocarbons | 0.74 |
| α-Methylstyrene | Aromatic hydrocarbons | 4.74 |
| Benzene, 1-propenyl- | Aromatic hydrocarbons | 0.53 |
| Benzene, 3-butenyl- | Aromatic hydrocarbons | 0.24 |
| Benzene, (1-methylenepropyl)- | Aromatic hydrocarbons | 0.27 |
| Indene | Aromatic hydrocarbons | 0.37 |
| Benzene, (1-methylenebutyl)- | Aromatic hydrocarbons | 0.22 |
| 1-Phenylbicyclo[2.1.1]hexane | Aromatic hydrocarbons | 0.21 |
| Unknown | Unknown | 2.10 |
| L-GIII | 1 | Toluene | Aromatic hydrocarbons | 1.29 |
| Cyclohexene, 4-ethenyl- | Aliphatic hydrocarbons | 3.80 |
| Ethylbenzene | Aromatic hydrocarbons | 0.47 |
| Styrene | Aromatic hydrocarbons | 92.25 |
| Unknown | Unknown | 2.20 |
| 2 | Benzene | Aromatic hydrocarbons | 0.68 |
| Toluene | Aromatic hydrocarbons | 7.03 |
| Cyclohexene, 4-ethenyl- | Aliphatic hydrocarbons | 0.36 |
| Ethylbenzene | Aromatic hydrocarbons | 3.55 |
| Styrene | Aromatic hydrocarbons | 58.01 |
| Benzene, (1-methylethyl)- | Aromatic hydrocarbons | 1.18 |
| Benzene, 2-propenyl- | Aromatic hydrocarbons | 1.60 |
| α-Methylstyrene | Aromatic hydrocarbons | 10.10 |
| Benzene, cyclopropyl- | Aromatic hydrocarbons | 0.53 |
| Benzene, 1-cyclobuten-1-yl- | Aromatic hydrocarbons | 0.55 |
| Benzene, 1-propenyl- | Aromatic hydrocarbons | 1.33 |
| Benzene, 3-butenyl- | Aromatic hydrocarbons | 0.66 |
| Benzene, (1-methylenepropyl)- | Aromatic hydrocarbons | 1.41 |
| Indene | Aromatic hydrocarbons | 2.20 |
| Benzene, (1-methylenebutyl)- | Aromatic hydrocarbons | 0.56 |
| Benzene, 3-pentenyl- | Aromatic hydrocarbons | 0.39 |
| 1H-Indene, 3-methyl- | Aromatic hydrocarbons | 0.44 |
| Naphthalene, 1,2-dihydro- | Aromatic hydrocarbons | 0.59 |
| Naphthalene | Aromatic hydrocarbons | 0.51 |
| 1-Phenylbicyclo[2.1.1]hexane | Aromatic hydrocarbons | 0.50 |
| Benzocycloheptatriene | Aromatic hydrocarbons | 0.24 |
| Biphenyl | Aromatic hydrocarbons | 0.23 |
| Diphenylmethane | Aromatic hydrocarbons | 0.29 |
| Bibenzyl | Aromatic hydrocarbons | 2.03 |
| Benzene, 1,1'-(1-methyl-1,2-ethanediyl)bis- | Aromatic hydrocarbons | 0.95 |
| Unknown | Unknown | 4.09 |
| 3 | Methylenecyclopropane | Aliphatic hydrocarbons | 0.27 |
| Benzene | Aromatic hydrocarbons | 0.25 |
| Toluene | Aromatic hydrocarbons | 5.72 |
| Cyclohexene, 4-ethenyl- | Aliphatic hydrocarbons | 0.48 |
| Ethylbenzene | Aromatic hydrocarbons | 1.21 |
| Styrene | Aromatic hydrocarbons | 79.26 |
| Benzene, 2-propenyl- | Aromatic hydrocarbons | 1.00 |
| α-Methylstyrene | Aromatic hydrocarbons | 6.61 |
| Benzene, 1-cyclobuten-1-yl- | Aromatic hydrocarbons | 0.23 |
| Benzene, 1-propenyl- | Aromatic hydrocarbons | 0.62 |
| Benzene, 3-butenyl- | Aromatic hydrocarbons | 0.28 |
| Benzene, (1-methylenepropyl)- | Aromatic hydrocarbons | 0.41 |
| Indene | Aromatic hydrocarbons | 0.63 |
| Benzene, (1-methylenebutyl)- | Aromatic hydrocarbons | 0.28 |
| Naphthalene, 1,2-dihydro- | Aromatic hydrocarbons | 0.21 |
| 1-Phenylbicyclo[2.1.1]hexane | Aromatic hydrocarbons | 0.23 |
| Benzene, 1,1'-(2-butene-1,4-diyl)bis- | Aromatic hydrocarbons | 0.52 |
| Unknown | Unknown | 1.79 |
| HIPS-V | 1 | Benzene | Aromatic hydrocarbons | 0.44 |
| Toluene | Aromatic hydrocarbons | 7.07 |
| Cyclohexene, 4-ethenyl- | Aliphatic hydrocarbons | 1.21 |
| Ethylbenzene | Aromatic hydrocarbons | 1.46 |
| Styrene | Aromatic hydrocarbons | 73.03 |
| Benzene, cyclopropyl- | Aromatic hydrocarbons | 1.23 |
| α-Methylstyrene | Aromatic hydrocarbons | 6.49 |
| Benzene, 2-propenyl- | Aromatic hydrocarbons | 1.10 |
| Benzene, 3-butenyl- | Aromatic hydrocarbons | 0.46 |
| Benzene, (1-methylenepropyl)- | Aromatic hydrocarbons | 0.73 |
| Indene | Aromatic hydrocarbons | 0.98 |
| Benzene, (1-methylenebutyl)- | Aromatic hydrocarbons | 0.40 |
| Dispiro[2.1.2.4]undecane, 8-methylene- | Aliphatic hydrocarbons | 0.33 |
| Benzene, (1-methylene-2-propenyl)- | Aromatic hydrocarbons | 0.24 |
| 1-Phenylbicyclo[2.1.1]hexane | Aromatic hydrocarbons | 0.37 |
| Bibenzyl | Aromatic hydrocarbons | 0.93 |
| Benzene, 1,1'-(1-methyl-1,2-ethanediyl)bis- | Aromatic hydrocarbons | 0.28 |
| Unknown | Unknown | 3.25 |
| MIX-GIII | 1 | Benzene | Aromatic hydrocarbons | 1.34 |
| Toluene | Aromatic hydrocarbons | 10.56 |
| 1,5-Cyclooctadiene, (E,Z)- | Aliphatic hydrocarbons | 0.57 |
| Ethylbenzene | Aromatic hydrocarbons | 5.42 |
| Styrene | Aromatic hydrocarbons | 58.86 |
| Benzene, (1-methylethyl)- | Aromatic hydrocarbons | 0.88 |
| Benzene, cyclopropyl- | Aromatic hydrocarbons | 1.07 |
| α-Methylstyrene | Aromatic hydrocarbons | 8.01 |
| Benzene, 2-propenyl- | Aromatic hydrocarbons | 0.31 |
| Benzene, 1-cyclobuten-1-yl- | Aromatic hydrocarbons | 0.22 |
| Benzene, 1-propenyl- | Aromatic hydrocarbons | 0.81 |
| Benzene, 3-butenyl- | Aromatic hydrocarbons | 0.34 |
| Benzene, (1-methylenepropyl)- | Aromatic hydrocarbons | 0.95 |
| Indene | Aromatic hydrocarbons | 1.55 |
| Benzene, (1-methylenebutyl)- | Aromatic hydrocarbons | 0.26 |
| 2-Methylindene | Aromatic hydrocarbons | 0.37 |
| Benzene, (1-methylene-2-propenyl)- | Aromatic hydrocarbons | 0.34 |
| Azulene | Aromatic hydrocarbons | 0.44 |
| Pentacyclo[6.4.0.0(2,10).0(3,6).0(9,11)]dodec-6(7)-ene | Aliphatic hydrocarbons | 0.21 |
| Biphenyl | Aromatic hydrocarbons | 0.21 |
| Bibenzyl | Aromatic hydrocarbons | 2.11 |
| Benzene, 1,1'-(1-methyl-1,2-ethanediyl)bis- | Aromatic hydrocarbons | 0.98 |
| Benzene, 1,1'-(2-butene-1,4-diyl)bis- | Aromatic hydrocarbons | 0.65 |
| Unknown | Unknown | 3.54 |
